# Supplementary material for: Generation and Propagation of Partially Coherent Power-Exponent-Phase Vortex Beam
Source: Frontiers journal article supplement (doi:10.3389/fphy.2021.781688), 2021-11-23
Supplement: Data_Sheet_2.DOCX [file Data_Sheet_2.DOCX]

Video 1: The details of the numerical simulations and experimental intensities of the PC-PEPV beam (*m* = 3) with high spatial coherence, where the power order *n* increase from 1 to 3 with step 0.1.

Video 2: The details of the numerical simulations and experimental intensities of the PC-PEPV beam (*m* = 3) with low spatial coherence, where the power order *n* increase from 1 to 3 with step 0.1.
